# Supplementary material for: Modifying the yeast very long chain fatty acid biosynthetic machinery by the expression of plant 3-ketoacyl CoA synthase isozymes
Source: Research Square preprint supplement (doi:10.21203/rs.3.rs-1153891/v1), 2021-12-14
Supplement: Supplementary file 1 [file 50bc0cfdc105eeabe62eda62.xlsx]

## Sheet: Table info
Supplementary Table 3: Statistical analyses of ZmKCS expressing and ZmKCS complementing yeast strains. ANOVA F-ratio and F-values were determined followed by post-hoc Tukey HSD. Different letters indicate statistical difference based upon Tukey HSD (p-value<0.05) for individual metabolites based upon analysis of three replicates.

## Sheet: WT
	Fatty acid	C10:0	C12:0	C14:0	C14:1	C15:0	C15:1	C16:0	C16:1	C17:0	C17:1	C18:0	C18:1	C20:0	C20:1	C22:0	C24:0	24:0-OH	C25:0	C26:0	C26:0-OH
	F ratio	1.8309	1.3161	1.3321	1.4025	2.4821	2.1565	1.4477	0.9839	1.5942	1.2404	1.5443	0.9751	2.0918	1.5467	1.4801	5.712	0.818	2.5339	14.224	0.4946
	Anova F value	0.0307	0.1949	0.185	0.1462	0.0024	0.0087	0.1252	0.5032	0.0743	0.248	0.089	0.5138	0.0112	0.0883	0.1118	<0.0001	0.7069	0.002	<0.0001	0.9735
	WT	B	AB	AB	AB	AB	A	AB	A	B	A	AB	A	AB	A	A	C	A	ABC	CDEFG	A
ZmKCS isozyme expressed in WT	KCS1	AB	AB	AB	AB	B	A	AB	A	AB	A	AB	A	AB	A	A	BC	A	AB	CDEFGH	A
	KCS2	AB	AB	AB	AB	AB	A	AB	A	AB	A	AB	A	A	A	A	A	A	A	A	A
	KCS3	AB	A	A	A	A	A	A	A	A	A	A	A	AB	A	A	C	A	ABC	DEFGG	A
	KCS4	AB	AB	AB	AB	AB	A	AB	A	AB	A	AB	A	B	A	A	BC	A	ABC	CDE	A
	KCS5	B	AB	AB	AB	AB	A	AB	A	AB	A	AB	A	AB	A	A	BC	A	ABC	CDEFGH	A
	KCS6	B	AB	AB	B	AB	A	AB	A	AB	A	AB	A	B	A	A	BC	A	ABC	CDEFGH	A
	KCS7	AB	AB	AB	AB	AB	A	AB	A	AB	A	AB	A	B	A	A	BC	A	ABC	CDEF	A
	KCS8	AB	AB	AB	AB	AB	A	AB	A	AB	A	AB	A	B	A	A	C	A	ABC	CDEF	A
	KCS9	AB	AB	AB	AB	AB	A	AB	A	AB	A	AB	A	B	A	A	C	A	ABC	FGH	A
	KCS10	AB	AB	AB	AB	AB	A	AB	A	AB	A	AB	A	B	A	A	BC	A	ABC	CDEF	A
	KCS11	B	AB	AB	AB	AB	A	AB	A	B	A	B	A	AB	A	A	AB	A	ABC	AB	A
	KCS12	B	B	B	AB	AB	A	B	A	B	A	B	A	AB	A	A	BC	A	ABC	CDEFGH	A
	KCS13	AB	AB	AB	AB	AB	A	AB	A	AB	A	AB	A	AB	A	A	BC	A	ABC	CDE	A
	KCS14	AB	AB	AB	AB	AB	A	AB	A	AB	A	AB	A	B	A	A	BC	A	ABC	CDEFGH	A
	KCS15	AB	AB	AB	AB	AB	A	AB	A	AB	A	AB	A	AB	A	A	BC	A	ABC	BC	A
	KCS16	AB	AB	AB	AB	AB	A	AB	A	AB	A	AB	A	AB	A	A	BC	A	ABC	CDEFGH	A
	KCS17	AB	AB	AB	AB	AB	A	AB	A	AB	A	AB	A	AB	A	A	C	A	ABC	CDEFGH	A
	KCS18	A	AB	AB	AB	A	A	AB	A	AB	A	AB	A	B	A	A	BC	A	ABC	GH	A
	KCS19	AB	AB	AB	AB	AB	A	AB	A	AB	A	AB	A	B	A	A	C	A	BC	H	A
	KCS20	AB	AB	AB	AB	AB	A	AB	A	AB	A	AB	A	AB	A	A	BC	A	AB	BCD	A
	KCS21	AB	AB	AB	AB	AB	A	AB	A	AB	A	AB	A	B	A	A	BC	A	AB	CDEFGH	A
	KCS22	AB	AB	AB	AB	AB	A	AB	A	AB	A	AB	A	AB	A	A	BC	A	ABC	CDEFG	A
	KCS23	AB	AB	AB	AB	AB	A	AB	A	AB	A	AB	A	B	A	A	BC	A	ABC	CDEF	A
	KCS24	AB	AB	AB	AB	AB	A	B	A	AB	A	B	A	B	A	A	BC	A	ABC	EFGH	A
	KCS25	AB	AB	AB	AB	AB	A	AB	A	AB	A	AB	A	AB	A	A	C	A	ABC	CDEF	A
	KCS27	AB	AB	AB	B	AB	A	AB	A	B	A	AB	A	B	A	A	C	A	C	GH	A

## Sheet: elo2 mutant
	Fatty acid	C10:0	C12:0	C14:0	C14:1	C15:0	C15:1	C16:0	C16:1	C17:0	C17:1	C18:0	C18:1	C18:0-OH	C20:0	C20:1	C21:0	C22:0	C22:0-OH	C24:0-OH	C24:0	C25:0	C26:0	C26:0-OH
	F ratio	1.4924	1.416	1.243	1.5661	3.7943	5.6114	1.8547	1.4063	6.6176	6.5828	1.9768	1.4855	1.2987	14.8427	2.5093	0.8897	3.7802	1.6829	0.9612	1.9386	1093.09	47.4048	1.463
	Anova F value	0.1031	0.1355	0.2423	0.0786	<0.0001	<0.0001	0.0258	0.1402	<0.0001	<0.0001	0.0159	0.1057	0.2023	<0.0001	0.0018	0.6214	<0.0001	0.0505	0.5318	0.0185	<0.0001	<0.0001	0.1146
	WT	A	A	A	AB	B	E	A	A	D	E	B	A	B	A	A	A	A	A	A	B	A	A	A
	elo2 mutant	B	A	A	AB	A	BCD	F	A	ABC	AB	AB	A	AB	B	B	A	B	A	A	AB	B	B	AB
ZmKCS isozyme expressed in scelo2	KCS1	AB	A	A	AB	A	ABCD	DEF	A	A	A	AB	A	AB	B	AB	A	B	A	A	AB	B	B	AB
	KCS2	B	A	A	AB	A	ABC	BCDEF	A	ABC	AB	AB	A	AB	B	B	A	B	A	A	A	B	B	B
	KCS3	AB	A	A	AB	A	ABCD	BCDEF	A	ABC	ABCD	AB	A	AB	B	B	A	B	A	A	AB	B	B	AB
	KCS4	AB	A	A	AB	A	BCD	DEF	A	ABC	ABCD	AB	A	AB	B	B	A	B	A	A	AB	B	B	AB
	KCS5	B	A	A	AB	A	BCD	F	A	ABC	ABCD	AB	A	AB	B	B	A	B	A	A	AB	B	B	AB
	KCS6	AB	A	A	AB	A	ABCD	BCDEF	A	AB	AB	AB	A	AB	B	B	A	B	A	A	AB	B	B	AB
	KCS7	AB	A	A	AB	A	ABCD	BCDEF	A	ABC	ABCD	AB	A	AB	B	AB	A	B	A	A	AB	B	B	AB
	KCS8	AB	A	A	AB	A	BCD	DEF	A	A	ABCD	AB	A	AB	B	AB	A	B	A	A	AB	B	B	B
	KCS9	AB	A	A	AB	A	CD	ABC	A	ABC	ABCD	A	A	AB	B	B	A	B	A	A	AB	B	B	AB
	KCS10	B	A	A	AB	A	ABCD	BCDEF	A	ABC	ABCD	AB	A	AB	B	B	A	B	A	A	AB	B	B	AB
	KCS11	AB	A	A	A	A	A	BCDEF	A	ABC	AB	AB	A	AB	B	B	A	B	A	A	A	B	B	AB
	KCS12	AB	A	A	AB	A	BCD	EF	A	AB	ABCD	AB	A	AB	B	AB	A	B	A	A	AB	B	B	B
	KCS13	AB	A	A	AB	A	BCD	EF	A	ABC	ABCD	AB	A	AB	B	B	A	B	A	A	AB	B	B	AB
	KCS14	AB	A	A	AB	A	ABCD	BCDEF	A	AB	AB	AB	A	AB	B	B	A	B	A	A	AB	B	B	B
	KCS15	AB	A	A	AB	A	AB	BCD	A	ABC	AB	AB	A	AB	B	B	A	B	A	A	A	B	B	AB
	KCS16	AB	A	A	AB	A	ABCD	BCDEF	A	AB	ABC	AB	A	AB	B	B	A	AB	A	A	AB	B	B	B
	KCS17	AB	A	A	AB	A	ABCD	BCDEF	A	ABC	ABCD	AB	A	AB	B	B	A	B	A	A	AB	B	B	AB
	KCS18	AB	A	A	AB	A	CD	AB	A	ABC	BCD	A	A	A	B	B	A	B	A	A	AB	B	B	AB
	KCS19	AB	A	A	AB	A	CDE	BCDE	A	BC	BCD	AB	A	AB	B	B	A	B	A	A	A	B	B	AB
	KCS20	AB	A	A	AB	A	ABCD	DEF	A	ABC	ABCD	AB	A	AB	B	B	A	AB	A	A	AB	B	B	AB
	KCS21	AB	A	A	AB	A	ABCD	CDEF	A	ABC	ABCD	AB	A	AB	B	B	A	B	A	A	AB	B	B	AB
	KCS22	AB	A	A	AB	A	ABCD	BCDEF	A	ABC	ABC	AB	A	AB	B	B	A	B	A	A	AB	B	B	AB
	KCS23	AB	A	A	AB	A	ABCD	BCDEF	A	ABC	AB	AB	A	AB	B	B	A	B	A	A	AB	B	B	AB
	KCS24	AB	A	A	AB	A	DE	BCDEF	A	BC	CDE	AB	A	AB	B	B	A	AB	A	A	A	B	B	B
	KCS25	AB	A	A	B	A	BCD	DEF	A	AB	ABCD	AB	A	AB	B	B	A	B	A	A	AB	B	B	AB
	KCS27	AB	A	A	AB	AB	DE	BCDEF	A	C	DE	AB	A	AB	B	B	A	B	A	A	A	B	B	B

## Sheet: elo3 mutant
	Fatty acid	C10:0	C12:0	C14:0	C14:1	C15:0	C15:1	C16:0	C16:1	C17:0	C17:1	C18:0	C18:1	C20:0	C20:1	C21:0	C22:0	C22:0-OH	C23:0	C24:0	C24:0-OH	C25:0	C26:0	C26:0-OH
	F ratio	6.6923	5.7801	3.4704	3.8366	4.226	3.8405	4.478	2.1856	15.339	3.7117	3.772	5.9066	7.5906	3.5508	3.3296	6.3807	3.0679	3.3369	3.2353	4.42	6.3686	86.8653	499.53
	Anova F value	<0.0001	<0.0001	<0.0001	<0.0001	<0.0001	<0.0001	<0.0001	0.0069	<0.0001	<0.0001	<0.0001	<0.0001	<0.0001	<0.0001	<0.0001	<0.0001	0.0002	<0.0001	<0.0001	<0.0001	<0.0001	<0.0001	<0.0001
	WT	AB	BC	ABC	B	D	D	AB	B	D	B	C	BC	B	B	C	B	B	C	B	C	A	A	A
	elo3 mutant	C	C	BC	B	BCD	BCD	C	B	AB	A	BC	AB	A	AB	A	A	A	A	B	BC	B	B	B
ZmKCS isozyme expressed in scelo3	KCS1	BC	BC	ABC	B	ABCD	ABCD	C	AB	ABC	A	BC	AB	A	AB	ABC	A	A	ABC	B	BC	B	B	B
	KCS2	C	BC	BC	B	ABCD	ABCD	ABC	AB	AB	A	BC	A	A	AB	A	A	A	ABC	B	B	B	B	B
	KCS3	BC	BC	BC	B	BCD	BCD	C	AB	ABC	A	BC	AB	A	AB	AB	A	A	ABC	B	B	B	B	B
	KCS4	C	C	BC	B	BCD	BCD	C	AB	ABC	A	BC	AB	A	AB	ABC	A	A	A	B	B	B	B	B
	KCS5	C	BC	BC	B	BCD	BCD	C	AB	ABC	A	BC	AB	A	AB	AB	A	A	ABC	B	BC	B	B	B
	KCS6	BC	BC	ABC	B	ABCD	ABCD	C	AB	ABC	A	BC	AB	A	AB	ABC	A	A	ABC	B	BC	B	B	B
	KCS7	C	C	C	B	BCD	BCD	C	B	ABC	A	BC	AB	A	AB	AB	A	A	A	B	BC	B	B	B
	KCS8	BC	BC	ABC	B	ABCD	ABCD	C	AB	ABC	A	BC	AB	A	AB	ABC	A	A	ABC	B	BC	B	B	B
	KCS9	BC	BC	BC	B	ABCD	ABCD	C	AB	ABC	A	BC	AB	A	AB	ABC	A	A	ABC	B	BC	B	B	B
	KCS10	C	BC	ABC	B	BCD	BCD	BC	AB	BC	A	BC	AB	A	AB	AB	A	A	ABC	B	BC	B	B	B
	KCS11	BC	BC	BC	B	BCD	BCD	C	AB	ABC	A	BC	AB	A	AB	AB	A	A	ABC	B	B	B	B	B
	KCS12	BC	BC	BC	AB	AB	AB	ABC	AB	ABC	A	AB	AB	A	AB	ABC	A	A	ABC	B	BC	B	B	B
	KCS13	C	BC	BC	B	BCD	BCD	C	AB	ABC	A	BC	AB	A	AB	AB	A	A	ABC	B	BC	B	B	B
	KCS14	C	BC	BC	B	BCD	BCD	BC	AB	AB	A	ABC	AB	A	AB	A	A	A	A	B	BC	B	B	B
	KCS15	C	C	BC	B	BCD	BCD	C	AB	BC	A	BC	AB	A	AB	ABC	A	A	A	A	A	A	B	B
	KCS16	C	BC	BC	B	BCD	BCD	C	B	ABC	A	BC	A	A	AB	A	A	A	ABC	B	BC	B	B	B
	KCS17	C	C	BC	B	CD	CD	C	B	ABC	A	BC	AB	A	AB	ABC	A	A	ABC	B	BC	B	B	B
	KCS18	A	A	BC	A	A	A	A	A	ABC	AB	A	AB	A	AB	BC	A	A	BC	B	B	B	B	B
	KCS19	BC	AB	ABC	AB	BCD	ABC	ABC	AB	ABC	A	ABC	AB	A	A	ABC	A	A	ABC	B	BC	B	B	B
	KCS20	C	C	BC	B	BCD	BCD	C	AB	AB	A	BC	A	A	A	AB	A	A	ABC	B	BC	B	B	B
	KCS21	C	BC	BC	B	BCD	BCD	C	AB	ABC	A	BC	A	A	A	A	A	A	AB	B	BC	B	B	B
	KCS22	BC	BC	ABC	AB	ABC	ABC	C	AB	A	A	BC	ABC	A	A	ABC	A	A	ABC	B	BC	B	B	B
	KCS23	BC	BC	ABC	AB	ABC	ABC	C	B	AB	A	BC	ABC	A	A	ABC	A	A	ABC	B	BC	B	B	B
	KCS24	BC	BC	ABC	B	ABCD	ABCD	C	AB	C	A	BC	C	A	A	ABC	A	A	ABC	B	BC	B	B	B
	KCS25	C	BC	BC	B	BCD	BCD	C	AB	AB	A	BC	C	A	A	AB	A	A	ABC	B	BC	B	B	B
	KCS27	BC	BC	ABC	AB	ABCD	ABCD	C	AB	ABC	A	BC	C	A	A	ABC	A	A	ABC	B	BC	B	B	B

## Sheet: elo2, elo3 double mutant
	Fatty acid	C10:0	C12:0	C14:0	C14:1	C15:0	C16:0	C16:1	C16:0-OH	C17:0	C17:1	C18:0	C18:1	C18:0-OH	C20:0	C20:1	C21:0	C22:0	C22:0-OH	C23:0	C24:0	C24:0-OH	C26:0	C26:0-OH
	F ratio	10.3721	7.5443	8.6338	35.6232	9.7805	1.3302	1.4714	11.2092	35.9015	44.5553	16.2677	4.7437	1.8143	112.387	13.2649	37.4624	134.848	17.3642	14.8452	17.9113	32.2611	58.4436	21.3769
	Anova F value	<0.0001	0.0004	0.0002	<0.0001	<0.0001	0.2991	0.2461	<0.0001	<0.0001	<0.0001	<0.0001	0.0047	0.1532	<0.0001	<0.0001	<0.0001	<0.0001	<0.0001	<0.0001	<0.0001	<0.0001	<0.0001	<0.0001
	BY4741 + pAG423	BC	B	AB	B	B	A	A	B	E	C	C	B	A	C	C	B	C	BC	B	BC	B	A	A
	BY4742 + pAG423	BC	B	BC	BC	B	A	A	B	CDE	BC	C	AB	A	C	BC	B	C	CD	B	CD	B	B	A
ZmKCS isozyme expressed in scelo2, scelo3	KCS2	BC	AB	C	C	B	A	A	A	DE	C	A	AB	A	B	BC	B	C	AB	B	D	B	D	B
	KCS4	BC	B	BC	BC	A	A	A	A	CD	BC	B	AB	A	C	BC	B	C	D	B	AB	A	D	B
	KCS11	C	B	ABC	B	A	A	A	B	A	A	BC	A	A	B	A	A	B	AB	B	AB	B	D	B
	KCS15	AB	B	AB	B	AB	A	A	AB	CD	BC	BC	B	A	C	BC	B	C	A	B	A	A	CD	A
	KCS20	A	A	A	A	A	A	A	AB	B	B	BC	B	A	A	B	A	A	A	A	A	B	D	B
	scelo2, scelo3 + pELO3	C	B	C	C	AB	A	A	A	BC	B	BC	AB	A	C	BC	B	C	CD	B	CD	B	C	A
